# Supplementary material for: Representing Ozone Formation from Volatile Chemical Products (VCP) in Carbon Bond (CB) Chemical Mechanisms
Source: MDPI journal article supplement (doi:10.3390/atmos15020178), 2024-01-31
Supplement: s1 [file s1]

## Representing Ozone formation from Volatile Chemical Products (VCP) in Carbon Bond (CB) Chemical Mechanisms

Greg Yarwood \*(1)

Katie Tuite (1)

(1) Ramboll, 7250 Redwood Boulevard Suite 105, Novato, CA 94945, USA

\*Author to whom correspondence should be addressed: [gyarwood@ramboll.com](mailto:gyarwood@ramboll.com)

### Supplementary Material

**Table S-1.** The top 39 compounds identified by ranking MIR- and SOA-weighted emissions in the VCPy 2019 US-wide emission inventory. The percentage of emissions, MIR or SOA for each compound is the contribution to that sum over all compounds. The entry for CB6 (Yes or No) indicates whether the compound is considered well-represented by the mechanism species of CB6r5 and CB6r3. C\* is the saturation vapor pressure in  $\mu\text{g m}^{-3}$ .

**Table S-2.** Mapping compounds present in VCPy and SPECIATE to the VCP and CB6 mechanism species.

**Table S-2.** Emissions of CB6 species for the for the Los Angeles box model scenario on July 31, 2011, in moles/day/km<sup>2</sup>.

**Figure S-1.** Meteorological conditions for the Los Angeles box model scenario shown in local standard time for July 29 to August 2, 2011.

**Figure S-2.** Time series for O<sub>3</sub>, NO and NO<sub>2</sub> in the Los Angeles box model scenario shown in local standard time for July 29 to August 2, 2011.

**Table S-1.** The top 39 compounds identified by ranking MIR- and SOA-weighted emissions in the VCPy 2019 US-wide emission inventory. The percentage of emissions, MIR or SOA for each compound is the contribution to the sum over all compounds. The entry for CB6 (Yes or No) indicates whether the compound is considered well-represented by the mechanism species of CB6r5 and CB6r3. C\* is the saturation vapor pressure in  $\mu\text{g m}^{-3}$ .

| No. | Name                                                  | % Mass | % MIR | % SOA | CB6? | log(C*) |
|-----|-------------------------------------------------------|--------|-------|-------|------|---------|
| 1   | Ethanol                                               | 17.7   | 26.5  | 0.0   | Y    | 8.0     |
| 2   | Acetone                                               | 11.4   | 8.9   | 0.0   | Y    | 8.9     |
| 3   | Isomers of Xylene                                     | 1.9    | 6.5   | 10.7  | Y    | 7.7     |
| 4   | Isopropyl Alcohol                                     | 7.4    | 8.8   | 0.0   | N    | 8.0     |
| 5   | Toluene                                               | 1.9    | 3.4   | 10.2  | Y    | 8.1     |
| 6   | Terpene                                               | 0.7    | 1.6   | 6.4   | Y    | 7.1     |
| 7   | 2,2,4-Trimethyl-1,3-Pentanediol Isobutyrate (Texanol) | 2.1    | 0.6   | 5.6   | N    | 4.2     |
| 8   | Ethylene Glycol                                       | 2.9    | 5.3   | 0.0   | N    | 5.3     |
| 9   | Alkanes, C14-16                                       | 1.2    | 0.3   | 6.1   | N    | 4.6     |
| 10  | Decamethylcyclopentasiloxane                          | 2.2    | 0.0   | 5.0   | N    | 6.6     |
| 11  | Limonene                                              | 0.6    | 1.4   | 5.2   | Y    | 7.0     |
| 12  | C11 Cycloalkanes                                      | 1.1    | 0.4   | 4.4   | Y    | 6.0     |
| 13  | C12 Cycloalkanes                                      | 0.9    | 0.3   | 4.6   | Y    | 5.4     |
| 14  | Alkyl (C16-C18) Methyl Esters                         | 0.8    | 0.2   | 4.7   | N    | 3.9     |
| 15  | Propylene Glycol                                      | 2.0    | 3.3   | 0.0   | N    | 5.5     |
| 16  | Isobutane                                             | 3.8    | 1.1   | 0.0   | N    | 9.8     |
| 17  | n-Dodecane                                            | 0.9    | 0.3   | 2.3   | Y    | 6.2     |
| 18  | Branched C12 Alkanes                                  | 1.3    | 0.5   | 1.5   | N    | 6.6     |
| 19  | Dimethylpolysiloxane                                  | 1.0    | 0.0   | 2.2   | Y    | 6.8     |
| 20  | Dimethyl Ether                                        | 1.3    | 1.9   | 0.0   | N    | 9.8     |
| 21  | Methanol                                              | 1.1    | 1.9   | 0.0   | Y    | 8.2     |
| 22  | Glycerol                                              | 1.2    | 1.8   | 0.0   | N    | 2.9     |
| 23  | n-Butane                                              | 2.1    | 0.6   | 0.0   | Y    | 9.6     |
| 24  | Ethyl Benzene                                         | 0.3    | 0.9   | 1.5   | Y    | 7.6     |
| 25  | Ethylene Glycol Monobutyl Ether                       | 1.1    | 1.0   | 0.4   | N    | 6.8     |
| 26  | 1,1-Difluoroethane (HFC-152a)                         | 1.7    | 0.6   | 0.0   | Y    | 10.1    |
| 27  | Methylene Chloride (Dichloromethane)                  | 1.5    | 0.5   | 0.0   | Y    | 9.2     |
| 28  | C13 Branched Alkanes                                  | 0.6    | 0.2   | 1.1   | N    | 6.2     |
| 29  | UNC peaks to CBM xylene                               | 0.2    | 0.6   | 1.0   | Y    | 7.6     |
| 30  | Diethylene Glycol Monobutyl Ether                     | 0.5    | 0.6   | 0.5   | N    | 5.4     |
| 31  | Ethyl Cyanoacrylate                                   | 0.5    | 0.7   | 0.3   | N    | 6.1     |
| 32  | Methyl Propylcyclohexanes                             | 0.3    | 0.1   | 1.0   | Y    | 7.3     |
| 33  | Cyclotetrasiloxane                                    | 0.4    | 0.0   | 0.9   | N    | 7.2     |
| 34  | Formic Acid                                           | 0.4    | 0.9   | 0.0   | Y    | 8.1     |

| No. | Name                             | % Mass | % MIR | % SOA | CB6? | log(C*) |
|-----|----------------------------------|--------|-------|-------|------|---------|
| 35  | Isomers Of Undecane              | 0.4    | 0.2   | 0.7   | Y    | 6.5     |
| 36  | Methyl Ethyl Ketone (2-Butanone) | 0.6    | 0.5   | 0.0   | Y    | 8.5     |
| 37  | C10 Cycloalkanes                 | 0.2    | 0.1   | 0.7   | Y    | 6.8     |
| 38  | C13 Cycloalkanes                 | 0.2    | 0.1   | 0.8   | N    | 5.4     |
| 39  | C15 Cycloalkanes                 | 0.1    | 0.0   | 0.7   | N    | 2.5     |

Notes:

The per-mass SOA and MIR values for each compound used to compute % MIR and % SOA may be found in the VCPy database at [https://github.com/USEPA/VCPy/tree/main/output/emissions\\_by\\_subpuc/2019](https://github.com/USEPA/VCPy/tree/main/output/emissions_by_subpuc/2019)

Species number 29 “UNC peaks to CBM xylene” is present in the SPECIATE database from VOC speciation profiles that identify compounds as being multiply substituted aromatic (and therefore suitable for mapping to CB model species XYL) without uniquely identifying those compounds. The relevant profiles date from the early 1990s.

**Table S-2.** Mapping compounds present in VCPy and SPECIATE to the VCP and CB6 mechanism species.

| Compound Name                                         | SPECIATE ID | CB6 & VCP Mapping     |
|-------------------------------------------------------|-------------|-----------------------|
| Ethanol                                               | 442         | ETOH                  |
| Acetone                                               | 281         | ACET                  |
| Isopropyl Alcohol                                     | 513         | IPOH                  |
| Ethylene Glycol                                       | 455         | EDOH                  |
| Isobutane                                             | 491         | IBTA                  |
| Isomers of xylene                                     | 507         | XYL                   |
| Propylene Glycol                                      | 680         | PDOH                  |
| Toluene                                               | 717         | TOL                   |
| Dimethyl Ether                                        | 417         | DME                   |
| Methanol                                              | 531         | MEOH                  |
| Glycerol                                              | 471         | IVOC                  |
| n-Butane                                              | 592         | 4 PAR                 |
| 1,1-Difluoroethane (HFC-152a)                         | 478         | NONR                  |
| 2,2,4-Trimethyl-1,3-Pentanediol Isobutyrate (Texanol) | 115         | ESTR + 8 PAR          |
| Methylene Chloride (Dichloromethane)                  | 401         | NONR                  |
| Propane                                               | 671         | PRPA                  |
| Terpene                                               | 705         | TERP                  |
| Formic Acid                                           | 466         | FACD                  |
| Methyl Ethyl Ketone (2-Butanone)                      | 536         | KET + 3 PAR           |
| Branched C12 Alkanes                                  | 3198        | HPAR                  |
| Alkanes, C14-16                                       | 3281        | IVOC                  |
| C11 Cycloalkanes                                      | 3227        | 0.75 HPAR + 2 PAR     |
| n-Undecane                                            | 610         | 0.75 HPAR + 2 PAR     |
| Ethylene Glycol Monobutyl Ether                       | 310         | ROH + 2 PAR           |
| C12 Cycloalkanes                                      | 3228        | HPAR                  |
| d-Limonene                                            | 392         | TERP                  |
| n-Dodecane                                            | 599         | HPAR                  |
| n-Heptane                                             | 600         | 0.083 HPAR + 6 PAR    |
| Methyl Acetate                                        | 2160        | MEAC                  |
| Diethylene Glycol Monobutyl Ether                     | 167         | ROH + 4 PAR           |
| Ethyl Benzene                                         | 449         | TOL + PAR             |
| Witch Hazel                                           | 774         | 0.85 NONR + 0.15 ETOH |
| Ethyl Cyanoacrylate                                   | 444         | NONR                  |
| Alkyl (C16-C18) Methyl Esters                         | 3129        | IVOC                  |
| Ethyl Acetate                                         | 440         | ETAC                  |
| C13 Branched Alkanes                                  | 1934        | 0.33 IVOC + 0.67 HPAR |
| DI-Limonene (Dipentene)                               | 435         | TERP                  |
| Isomers Of Decane                                     | 500         | 0.5 HPAR + 4 PAR      |
| 2-Amino-2-Methyl-1-Propanol                           | 169         | NONR                  |

| Compound Name                                      | SPECIATE ID | CB6 & VCP Mapping     |
|----------------------------------------------------|-------------|-----------------------|
| UNC peaks to CBM xylene                            | 2278        | XYL                   |
| Diethylene Glycol Monoethyl Ether                  | 331         | ROH + 2 PAR           |
| Parachlorobenzotrifluoride                         | 652         | NONR                  |
| Hydrocarbon Propellant (LPG, Sweetened)            | 483         | PRPA                  |
| Sec-Butyl Alcohol                                  | 692         | ROH                   |
| m-Xylene                                           | 524         | XYL                   |
| Isomers Of Undecane                                | 505         | 0.75 HPAR + 2 PAR     |
| N-Butyl Acetate                                    | 593         | ESTR + 2 PAR          |
| Methyl Propylcyclohexanes                          | 545         | 0.5 HPAR + 4 PAR      |
| n-Decane                                           | 598         | 0.5 HPAR + 4 PAR      |
| Branched C11 alkanes                               | 3197        | 0.75 HPAR + 2 PAR     |
| Propylene Glycol Butyl Ether (1-Butoxy-2-Propanol) | 681         | ROH + 3 PAR           |
| Styrene                                            | 698         | XYL                   |
| 1,1,1,2-Tetrafluoroethane (HFC-134a)               | 3186        | NONR                  |
| N-Nonane                                           | 603         | 0.33 HPAR + 5 PAR     |
| Branched C6 Alkanes                                | 3201        | 6 PAR                 |
| Citronella Oil                                     | 3121        | TERP                  |
| C7 Cycloalkanes                                    | 550         | 0.083 HPAR + 6 PAR    |
| Voc Ingredients < 0.1%                             | 772         | IVOC                  |
| C10 Cycloalkanes                                   | 3226        | 0.5 HPAR + 4 PAR      |
| n-Hexane                                           | 601         | 6 PAR                 |
| Ethylmethylcyclohexanes                            | 461         | 0.33 HPAR + 5 PAR     |
| Other, Misc. VOC Compounds Aggregated In Profile   | 641         | NONR                  |
| O-Xylene                                           | 620         | XYL                   |
| C10 Internal Alkenes                               | 316         | TERP                  |
| Benzyl Alcohol                                     | 306         | TOL                   |
| Isobutyl Alcohol                                   | 493         | ROH                   |
| Isomers Of Butylbenzene                            | 499         | TOL + 3 PAR           |
| Diethyl Phthalate                                  | 2355        | IVOC                  |
| Trimethylbenzenes                                  | 755         | XYL + PAR             |
| C13 Cycloalkanes                                   | 3229        | 0.33 IVOC + 0.67 HPAR |
| Dipropylene Glycol Monomethyl Ether                | 395         | ROH + 3 PAR           |
| Dipropylene Glycol Methyl Ether Acetate            | 3165        | ETHR + 5 PAR          |
| Diethylene Glycol                                  | 406         | ROH                   |
| Methyl Isobutyl Ketone (Hexone)                    | 539         | KET + 5 PAR           |
| Misc. oxygenated compounds                         | 576         | IVOC                  |
| n-Pentane                                          | 605         | 5 PAR                 |
| 2-methyldecane                                     | 192         | 0.75 HPAR + 2 PAR     |
| n-Tridecane                                        | 609         | 0.33 IVOC + 0.67 HPAR |
| n-Butyl Alcohol                                    | 595         | ROH                   |

| Compound Name                                            | SPECIATE ID | CB6 & VCP Mapping  |
|----------------------------------------------------------|-------------|--------------------|
| Branched C9 Alkanes                                      | 3204        | 0.33 HPAR + 5 PAR  |
| 2,4-Dimethyloctane                                       | 151         | 0.5 HPAR + 4 PAR   |
| Isobutyl Acetate                                         | 492         | ESTR + 2 PAR       |
| Diacetone                                                | 396         | KET + 5 PAR        |
| Citrus Terpenes                                          | 378         | TERP               |
| 2,4,5-Trimethylheptane                                   | 145         | 0.33 HPAR + 5 PAR  |
| Branched C7 Alkanes                                      | 3202        | 0.083 HPAR + 6 PAR |
| Aliphatics                                               | 601         | 0.5 HPAR + 4 PAR   |
| o-Xylene                                                 | 620         | XYL                |
| 1,2,4-Trimethylbenzene                                   | 30          | XYL + PAR          |
| Propylene Glycol Monomethyl Ether (1-Methoxy-2-propanol) | 682         | ROH                |
| Hexane                                                   | 601         | 6 PAR              |
| Linalyl Acetate                                          | 9127        | TERP               |
| 2-Methyloctane                                           | 198         | 0.33 HPAR + 5 PAR  |
| 2,2,4,6,6-Pentamethylheptane                             | 114         | 0.75 HPAR + 2 PAR  |
| Isopropylcyclohexane                                     | 515         | 0.33 HPAR + 5 PAR  |
| Phenoxyethanol                                           | 664         | TOL + PAR          |
| Butylcyclohexane                                         | 312         | 0.5 HPAR + 4 PAR   |
| Cyclohexane                                              | 385         | 6 PAR              |
| Propylene Glycol N-Propyl Ether                          | 685         | ROH + 2 PAR        |
| Acetic Acid                                              | 280         | AACD               |
| Trimethylcyclohexane                                     | 756         | 0.33 HPAR + 5 PAR  |
| C11 Internal Alkenes                                     | 319         | IOLE + 7 PAR       |
| Ethyl Methacrylate                                       | 3108        | OLE + 4 PAR        |
| N,N-Diethyl-M-Toluamide                                  | 2202        | NONR               |
| 2-Methylheptane                                          | 193         | 0.167 HPAR + 6 PAR |
| Cyclopentane                                             | 390         | 5 PAR              |
| Branched C8 Alkanes                                      | 3203        | 0.167 HPAR + 6 PAR |
| n-Undecane                                               | 610         | 0.75 HPAR + 2 PAR  |
| m-Xylene                                                 | 524         | XYL                |
| C11 Trialalkyl Benzenes                                  | 3257        | XYL + 3 PAR        |
| 2-Methylpentane                                          | 2681        | 6 PAR              |
| 2-Methylnonane                                           | 197         | 0.5 HPAR + 4 PAR   |
| Hexyl Acetate                                            | 1020        | ESTR + 4 PAR       |
| N-Methylpyrrolidinone                                    | 85          | NONR               |
| Dipropylene Glycol                                       | 432         | ROH + 2 PAR        |
| 2,4-Dimethyl-1-Pentene                                   | 146         | OLE + 5 PAR        |
| Methyl Amyl Ketone                                       | 532         | KET + 5 PAR        |
| n-Propyl Alcohol                                         | 607         | NPOH               |
| Misc. esters                                             | 568         | ESTR + PAR         |

| Compound Name                                              | SPECIATE ID | CB6 & VCP Mapping  |
|------------------------------------------------------------|-------------|--------------------|
| C10 Trialkylbenzenes                                       | 3206        | XYL + 2 PAR        |
| Propylene Glycol Monomethyl Ether Acetate                  | 684         | ETHR + 2 PAR       |
| C15 Cycloalkanes                                           | 3231        | IVOC               |
| C6 Cycloalkanes                                            | 3234        | 6 PAR              |
| Dimethylnonane                                             | 429         | 0.75 HPAR + 2 PAR  |
| Isoparaffins                                               | 3307        | 0.167 HPAR + 6 PAR |
| Glycol Ether Dpnb (1-(2-Butoxy-1-Methylethoxy)-2-Propanol) | 473         | IVOC               |
| 1,2,4-Trimethylbenzene                                     | 30          | XYL + 2 PAR        |
| C8 Cycloalkanes                                            | 3258        | 0.167 HPAR + 6 PAR |
| Propenylcyclohexane                                        | 672         | OLE + 7 PAR        |
| Ethyl-3-Ethoxypropionate                                   | 448         | ETHR + 3 PAR       |
| n-Heptane                                                  | 600         | 0.083 HPAR + 6 PAR |
| 1,3,5-Trimethylbenzene                                     | 44          | XYL + 2 PAR        |
| 1,3,5-trimethylbenzene                                     | 44          | XYL + 2 PAR        |
| cis-1,3-dimethylcyclohexane                                | 352         | 0.167 HPAR + 6 PAR |
| Acrylic Acid                                               | 1903        | IVOC               |
| 2-methylhexane                                             | 194         | 0.083 HPAR + 6 PAR |
| n-Pentadecane                                              | 1049        | IVOC               |
| 3-methylheptane                                            | 244         | 0.167 HPAR + 6 PAR |
| C9 Cycloalkanes                                            | 2170        | 0.33 HPAR + 5 PAR  |
| n-Octane                                                   | 604         | 0.33 HPAR + 5 PAR  |
| Oxygenates                                                 | 2215        | ETHR + PAR         |
| Triethanolamine                                            | 750         | NONR               |
| C11 Tetrasubstituted Benzenes                              | 3208        | IVOC               |
| N-Octane                                                   | 604         | 0.33 HPAR + 5 PAR  |
| 2-Pyrrolidone                                              | 3148        | NONR               |
| 1-Ethyl-2-Propyl Cyclohexane                               | 447         | 0.5 HPAR + 4 PAR   |
| Methyldecene                                               | 553         | OLE + 9 PAR        |
| N-Propylbenzene                                            | 608         | TOL + 2 PAR        |
| C16 Branched Alkanes                                       | 1941        | IVOC               |
| Vinyl Acetate                                              | 768         | OLE + 2 PAR        |
| n-Nonane                                                   | 603         | 0.33 HPAR + 5 PAR  |
| Tetramethylpentanone                                       | 710         | KET + 8 PAR        |
| Ethylcyclohexane                                           | 450         | 0.33 HPAR + 5 PAR  |
| Tetramethylbenzenes                                        | 23          | IVOC               |
| Methyl Ethyl Ketoxime                                      | 537         | NONR               |
| Isomers Of Dodecane                                        | 503         | HPAR               |
| T-Butylbenzene                                             | 703         | TOL + 3 PAR        |
| Propyl Acetate                                             | 674         | ESTR + PAR         |
| Trimethylhexene                                            | 759         | OLE + 7 PAR        |

| Compound Name                                                                 | SPECIATE ID | CB6 & VCP Mapping     |
|-------------------------------------------------------------------------------|-------------|-----------------------|
| Diethylene Glycol Monomethyl Ether                                            | 534         | ROH + PAR             |
| Branched C10 Alkanes                                                          | 3196        | 0.5 HPAR + 4 PAR      |
| Peroxyacetic Acid                                                             | 660         | AACD                  |
| Dimethylheptanes                                                              | 428         | 0.33 HPAR + 5 PAR     |
| Ethylene Glycol Monopropyl Ether                                              | 458         | ROH + PAR             |
| Dimethylethylcyclohexane                                                      | 427         | 0.5 HPAR + 4 PAR      |
| C5 Branched Alkanes                                                           | 3200        | 5 PAR                 |
| Propanoic Acid, 2-Methyl-2,2-Dimethyl-1-(1-Methylethyl)-1,3-Propanediyl Ester | 3317        | IVOC                  |
| C10 Dialkyl Benzenes                                                          | 3256        | XYL + 2 PAR           |
| trans-1,3-dimethylcyclohexane                                                 | 726         | 0.33 HPAR + 5 PAR     |
| C14 Cycloalkanes                                                              | 3230        | 0.67 IVOC + 0.33 HPAR |
| 1,2,3-Trimethylbenzene                                                        | 25          | XYL + PAR             |
| Dibasic Ester                                                                 | 3289        | ESTR + 2 PAR          |
| 4-methylnonane                                                                | 266         | 0.5 HPAR + 4 PAR      |
| Propyl Heptene                                                                | 675         | OLE + 8 PAR           |
| p-Ethyltoluene                                                                | 94          | XYL + PAR             |
| 1,2,3,5-Tetramethylbenzene                                                    | 23          | IVOC                  |
| o-Ethyltoluene                                                                | 80          | XYL + PAR             |
| 2-ethoxyethyl acetate (or cellosolve acetate)                                 | 173         | ETHR + 2 PAR          |
| C16 Cycloalkanes                                                              | 3232        | IVOC                  |
| p-Xylene                                                                      | 648         | XYL                   |
| C12 Trisubstituted Benzenes                                                   | 3211        | XYL + PAR             |
| Ketones - general                                                             | 2137        | KET + 4 PAR           |
| 2,6-dimethylheptane                                                           | 160         | 0.33 HPAR + 5 PAR     |
| Polytetrafluoroethylene                                                       | 3314        | NONR                  |
| Diacetone Alcohol                                                             | 396         | ROH + 2 PAR           |
| Methylindans                                                                  | 2186        | IVOC                  |
| Aliphatics                                                                    | 290         | IVOC                  |
| Pentanedioic Acid, Dimethyl Ester                                             | 656         | IVOC                  |
| Soybean Oil                                                                   | 3264        | IVOC                  |
| 1-Methyl-2-Ethylbenzene                                                       | 80          | XYL + PAR             |
| Methyl Methacrylate                                                           | 541         | OLE + 2 PAR           |
| Hydroxypropyl Methacrylate                                                    | 3306        | OLE + 3 PAR           |
| C15 Branched Alkanes                                                          | 1938        | IVOC                  |
| Methylundecane                                                                | 2199        | HPAR                  |
| 1,2,3-trimethylbenzene                                                        | 25          | XYL + PAR             |
| 3-methyldecane                                                                | 243         | 0.75 HPAR + 2 PAR     |
| n-Tetradecane                                                                 | 1051        | 0.67 IVOC + 0.33 HPAR |
| 1,2,4-trimethylcyclopentane                                                   | 31          | 0.167 HPAR + 6 PAR    |



| Compound Name | SPECIATE ID | CB6 & VCP Mapping |
|---------------|-------------|-------------------|
| Naphthalene   | 611         | IVOC              |
| Camphor       | 330         | IVOC              |

**Table S-3.** Emissions of CB6 species for the for the Los Angeles box model scenario on July 31, 2011, in moles/day/km<sup>2</sup>.

| <b>CB6 Species</b> | <b>Emissions<br/>(moles/day/km<sup>2</sup>)</b> |
|--------------------|-------------------------------------------------|
| ACET               | 15.59                                           |
| ALD2               | 5.25                                            |
| ALDX               | 4.62                                            |
| BENZ               | 8.34                                            |
| CO                 | 6952.66                                         |
| ETH                | 41.44                                           |
| ETHA               | 37.45                                           |
| ETHY               | 13.66                                           |
| ETOH               | 34.84                                           |
| FORM               | 11.55                                           |
| HONO               | 3.19                                            |
| IOLE               | 13.87                                           |
| ISOP               | 0.10                                            |
| KET                | 4.68                                            |
| MEOH               | 20.39                                           |
| NO                 | 410.69                                          |
| NO2                | 49.12                                           |
| OLE                | 29.18                                           |
| PAR                | 1184.29                                         |
| PRPA               | 17.26                                           |
| TERP               | 1.61                                            |
| TOL                | 41.46                                           |
| NONR               | 75.47                                           |
| XYL                | 28.39                                           |

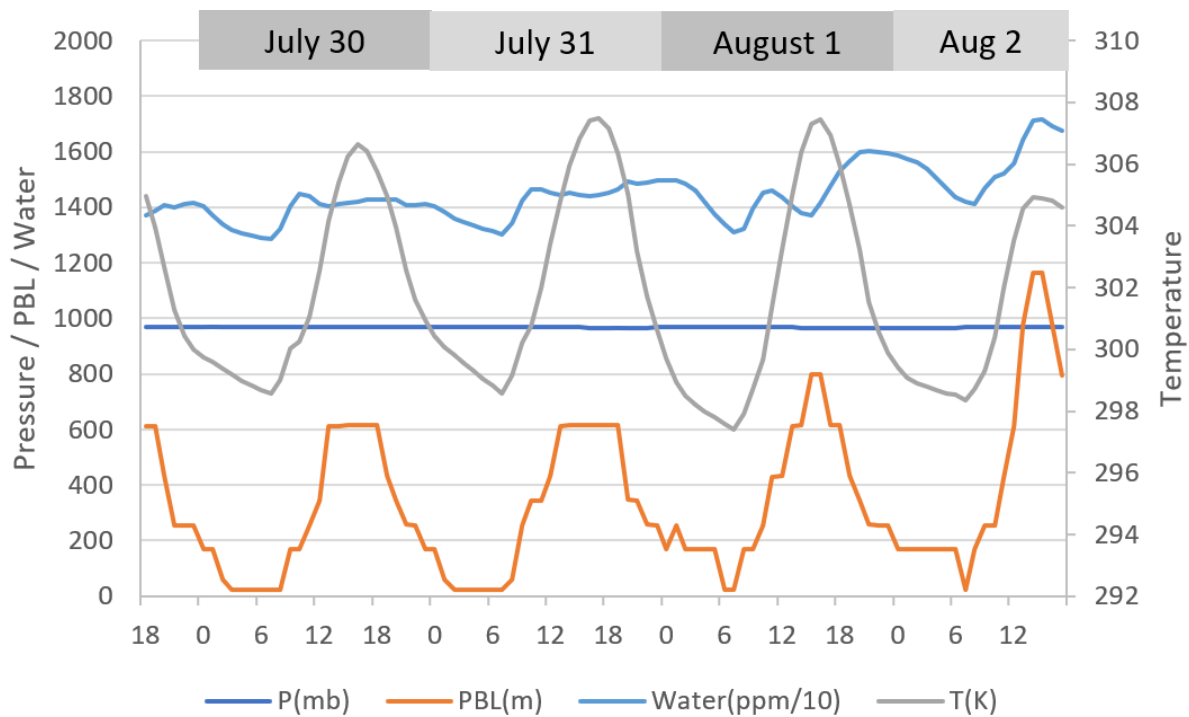

**Figure S-1.** Meteorological conditions for the Los Angeles box model scenario shown in local standard time for July 29 to August 2, 2011.

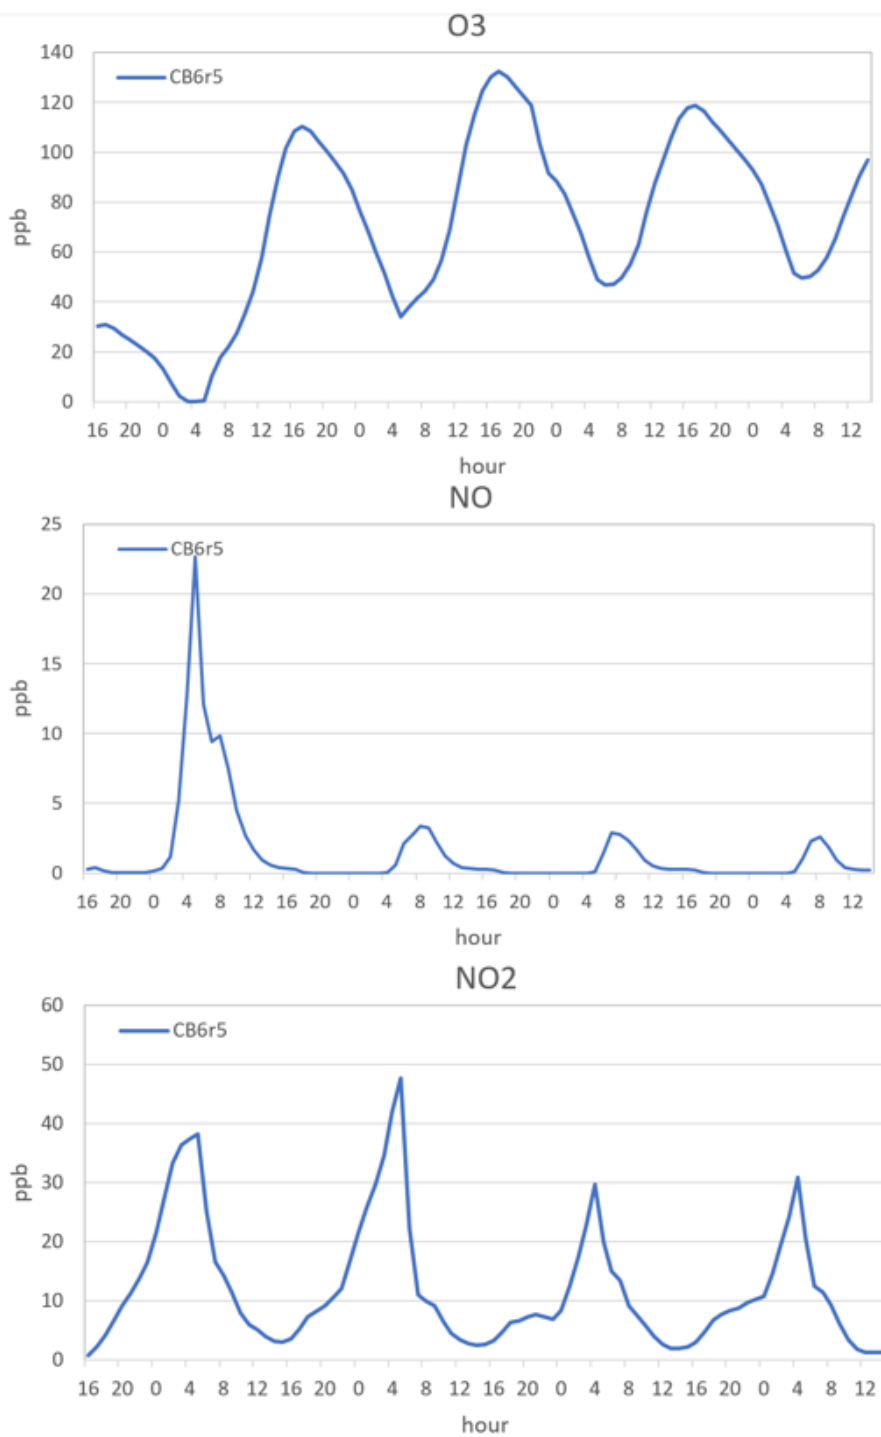

**Figure S-2.** Time series for O<sub>3</sub>, NO and NO<sub>2</sub> in the Los Angeles box model scenario shown in local standard time for July 29 to August 2, 2011.
